# Supplementary material
Source: publisher figshare collection journal article supplement (https://acs.figshare.com/ndownloader/files/4159972)
Supplement: Supplementary file 1 [file 4159972]

## **Supporting Information**

### **Perfluoroalkyl Acids in the Atlantic and Canadian Arctic Oceans**

Jonathan P. Benskin<sup>1†</sup>, Derek C.G. Muir<sup>2</sup>, Brian F. Scott<sup>2</sup>, Christine Spencer<sup>2</sup>, Amila O. De Silva<sup>2</sup>, Henrik Kylin<sup>3</sup>, Jonathan W. Martin<sup>1</sup>, Adam Morris<sup>4</sup>, Rainer Lohmann<sup>5</sup>, Gregg Tomy<sup>6</sup>, Bruno Rosenberg<sup>6</sup>, Sachi Taniyasu<sup>7</sup>, Nobuyoshi Yamashita<sup>7</sup>

<sup>1</sup>Dept. of Laboratory Medicine and Pathology, University of Alberta, Edmonton, AB T6G 2G3 Canada

<sup>2</sup>Aquatic Contaminants Research Division, Environment Canada, Burlington ON L7R 4A6 Canada

<sup>3</sup>Dept. of Water and Environmental Studies, Linköping University, SE-581 83 Linköping, Sweden

<sup>4</sup>Dept. of Environmental Biology, University of Guelph, Guelph ON, N1G 2W1 Canada.

<sup>5</sup>Graduate School of Oceanography, University of Rhode Island, Narragansett, RI 02882-1197, USA

<sup>6</sup>Dept. of Fisheries and Oceans Canada, Arctic Aquatic Research Div., Winnipeg, MB R3T 2N6, Canada

<sup>7</sup>National Institute of Advanced Industrial Science and Technology, Tsukuba, Ibaraki 305-8569, Japan

<sup>†</sup>Current address: AXYS Analytical Services Ltd., Sidney, BC V8L 5X2, Canada

---

#### **Corresponding author**

Derek Muir

Aquatic Contaminants Research Division,  
Environment Canada,  
Burlington ON, L7R 4A6 Canada,

Email: [derek.muir@ec.gc.ca](mailto:derek.muir@ec.gc.ca)

Phone: 905-319-6921 ; Fax : 905-336-6430

## MATERIALS AND METHODS

### *Analytical standards and reagents*

Oasis WAX solid phase extraction (SPE) cartridges (6 cm<sup>3</sup>, 150 mg, 30 µm) were obtained from Waters (Waters Corporation, Milford, Mass). Centrifuge tubes (15 mL polypropylene (PP)), PP sample bottles, Methanol (MeOH; Omnisolv), HPLC grade water (OmniSolv) and 25% ammonia solution were obtained from VWR (Mississauga, ON). Ammonium acetate was supplied by Fisher Scientific (Toronto, ON). All HPLC grade water utilized in this work was passed through an Oasis WAX SPE cartridge prior to use. Further details on standards and solvents are provided in Scott et al.<sup>1</sup> SPE-cleaned water along with eluents used for SPE were analyzed for possible PFAA contamination prior to use (see following section).

Perfluorohexanoic acid (PFHxA) was obtained from Oakwood Products Inc. (West Columbia, SC). Perfluoroheptanoic acid (PFHpA), perfluorooctanoic acid (PFOA), perfluorononanoic acid (PFNA), perfluorodecanoic acid (PFDA), perfluoroundecanoic acid (PFUnDA), perfluorododecanoic acid (PFDoDA), and perfluorotetradecanoic acid (PFTDA) were supplied by Aldrich Chemicals, (Milwaukee, WI). Perfluorobutanesulfonate (PFBS), perfluorohexane sulfonate (PFHxS), perfluorooctane sulfonate (PFOS), perfluoroheptane sulfonate (PFHpS), perfluorodecane sulfonate (PFDS), perfluorooctane sulfonamide (FOSA), the internal standards (spiked prior to extraction) <sup>13</sup>C<sub>2</sub>-PFHxA, <sup>13</sup>C<sub>4</sub>-PFOA, <sup>13</sup>C<sub>5</sub>-PFNA, <sup>13</sup>C<sub>2</sub>-PFDA, <sup>13</sup>C<sub>2</sub>-PFUnDA, <sup>13</sup>C<sub>2</sub>-PFDoDA, <sup>13</sup>C<sub>4</sub>-PFOS, <sup>18</sup>O<sub>2</sub>-PFHxS, and instrument performance standards (spiked after extraction and immediately prior to analysis) <sup>13</sup>C<sub>2</sub>-PFOA, <sup>13</sup>C<sub>8</sub>-PFOS, <sup>13</sup>C<sub>9</sub>-PFNA, and <sup>13</sup>C<sub>7</sub>-PFUnDA were purchased from Wellington Laboratories (Guelph, ON).

### *PFAA analysis in solvents and reagents*

PFAA concentrations in SPE-extracted HPLC water was determined by subtracting the average quantity of PFAA in stay lab blanks (prepared with only 4mL of SPE-cleaned water; Table S10) from the average quantity of PFAAs observed in “stay” blanks (prepared with 1L of SPE-cleaned water; Table S10), divided by the difference in volume between the blanks (996mL). Concentrations of PFAAs in SPE-cleaned water were: 29 pg/L PFHxA, 18 pg/L PFHpA, 5.8 pg/L PFOA, 2.1 pg/L PFNA, and 1.2 pg/L of FOSA. The SPE-cleaned water used to prepare each sample (4mL for priming the cartridges+4mL for rinsing+0.25mL used to bring the final volume of extract to 0.5mL = 4.25mL SPE-cleaned water used per/sample) is therefore expected to contribute <1pg of each of the aforementioned PFAAs per sample.

Eluents were also examined routinely for signs of PFAA contamination. 6 mL of MeOH or 8 mL of 0.1% ammonia in MeOH was added to a polypropylene centrifuge tube and reduced to 0.5 mL under nitrogen, then analyzed by HPLC-MS/MS. PFAAs were not typically detected in the 100% MeOH eluent, however the 0.1% ammonia in MeOH eluent occasionally contained measurable levels of PFAAs (<2pg PFHxA, <13pg PFHpA, <20pg PFOA, <1pg PFDA, <3pg PFUnDA, <1pg of PFTrDA, <1pg of PFHxS, <15pg PFOS, and <1 pg FOSA), likely attributable specifically to the ammonia solution used to prepare it. Any minor contamination of eluents is expected to have been accounted for by lab blanks, which were subtracted from samples in all instances.

### *Extraction of samples and instrumental analysis*

Water samples were spiked with internal standards (50 pg of each isotope-labeled standard listed in Table S3) prior to extraction, except for a subset of samples used in the interlaboratory comparison (half of the 2008 Gjoa Haven and Resolute Bay samples and all of the 2009 Resolute Bay samples), which were not spiked. Samples were extracted using Oasis WAX cartridges (150 mg, 6 cm<sup>3</sup>) as follows: after pre-conditioning with 4 mL of 0.1% ammonia in MeOH, 4 mL MeOH, and 4mL of WAX SPE-extracted water, samples were loaded onto SPE cartridges at a rate of 1 drop/second. After loading, cartridges were rinsed with 4mL of 25 mM acetate buffer and then centrifuged at 3000 rpm to remove any remaining water. Target analytes were eluted with 6 mL of MeOH, followed by 8 mL of 0.1% ammonia in MeOH. The eluents were combined and reduced to just under 250 µL and then spiked with 50 pg of instrument performance standards (Table S3; except for the aforementioned interlaboratory samples which were not spiked). The extract was brought to 250 µL (confirmed by weight), and then 250 µL of WAX SPE-extracted HPLC grade water was added. The final extract (500 µL final volume; 50% MeOH/water) was vortexed and then transferred to a polypropylene microvial for analysis by HPLC-MS/MS.

PFAAs were analyzed by liquid chromatography tandem mass spectrometry (HPLC-MS/MS) using an Agilent 1100 HPLC coupled to an API 4000 triple quadrupole mass spectrometer (AB Sciex, Concord ON, Canada) operated in negative ionization mode with multiple reaction monitoring. Extracts were injected (10-100 µL) onto a SecurityGuard<sup>TM</sup> C18 guard cartridge (5 µm, 2 mm i.d. × 4 mm) coupled to a Luna C18 HPLC column (3 µm, 2 mm i.d. x 50 mm,) using 0.01 M aqueous ammonium acetate solution prepared with Milli-Q water (solvent A) and MeOH (solvent B) as the mobile phase. Column temperature was 35 °C. Eight-point calibration curves were produced for each set of samples analyzed using varying concentrations of the standards from just above the instrumental quantification limit up to two-fold this value. All

PFAAs were quantified as the sum of all isomers. Further instrumental details are provided in Scott et al.<sup>1</sup>

For the 2007 *Oden* samples, concentrations reported are the mean of  $n=2$  samples/location while for the 2005 *Oden* samples a second subset consisting of the combined remaining sample from each site (500 mL) was analyzed later to confirm the results for the first batch of samples because of lab blank contamination. For all remaining sampling cruises, the PFAA concentrations reported are based on  $n=1$  sample/location.

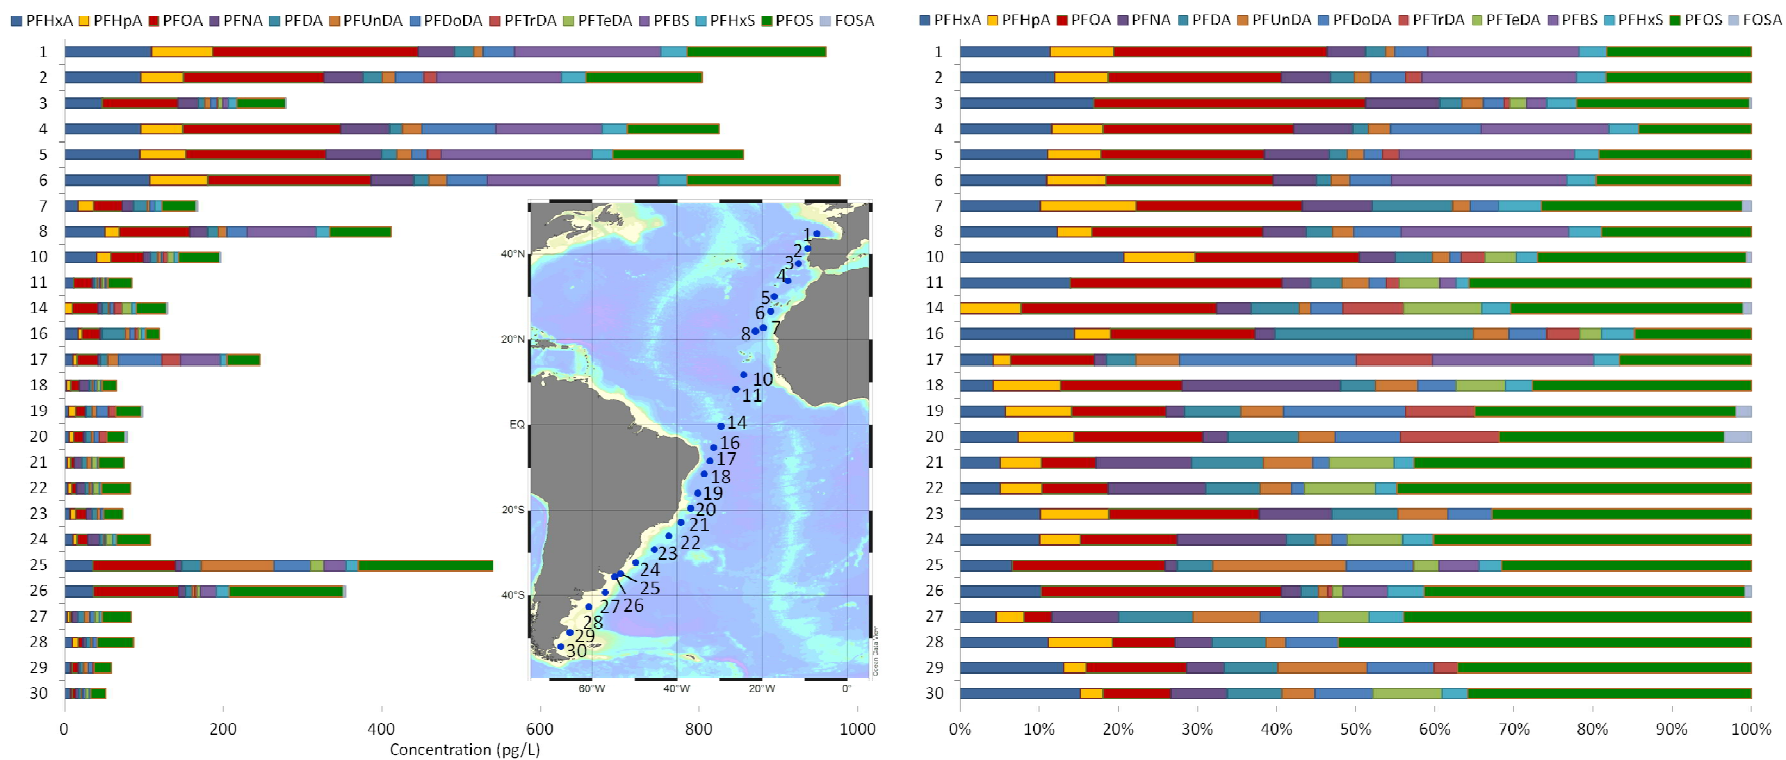

**Figure S1.**  $\Sigma$ PFAA concentrations (pg/L) and relative profile for 2007 *Oden* Cruise (Bay of Biscay to Argentina).

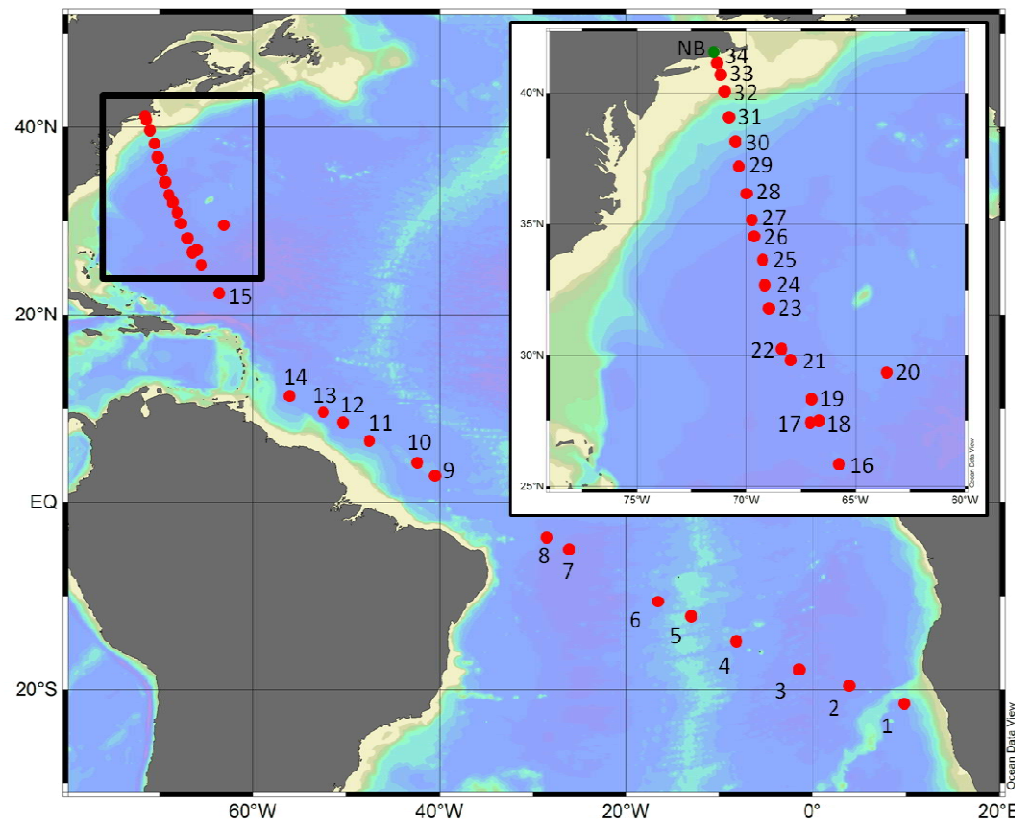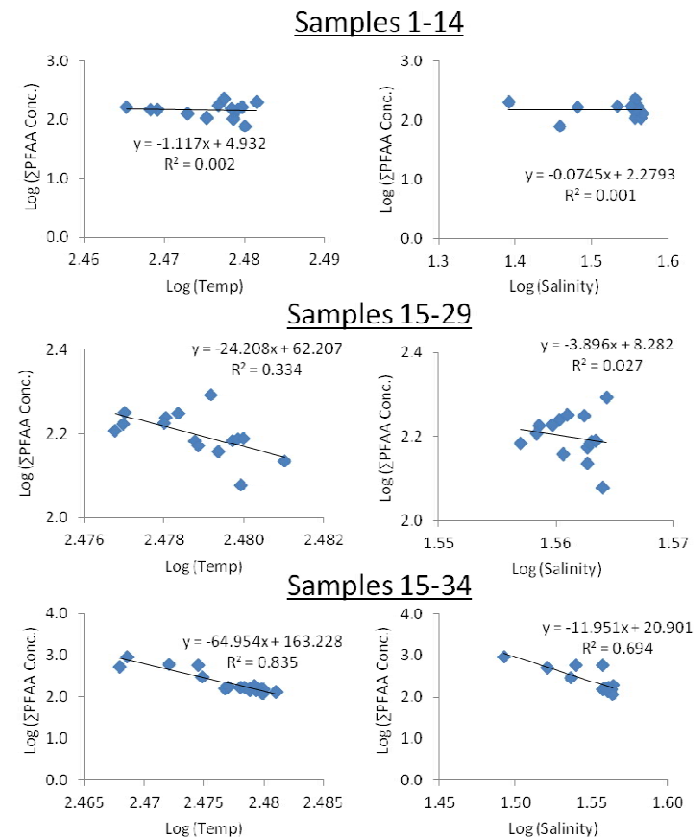

**Figure S2.** Regressions of Log( $\Sigma$ PFAA concentration) versus Temperature and Salinity for 2009 Endeavour cruise from Namibia to Rhode Island. Regressions were performed on samples 1-14 (Bengula Current, South Equatorial Current and North Brazil Current), samples 15-29 (Antilles Current/Gulf Stream), and samples 15-34 (Antilles Current/Gulf Stream/Coastal Water). A dramatic increase in  $\Sigma$ PFAA concentrations was observed upon crossing from the Gulf Stream into the cold waters of the Eastern Seaboard United States as shown by the correlation with decreasing water temperature and salinity.

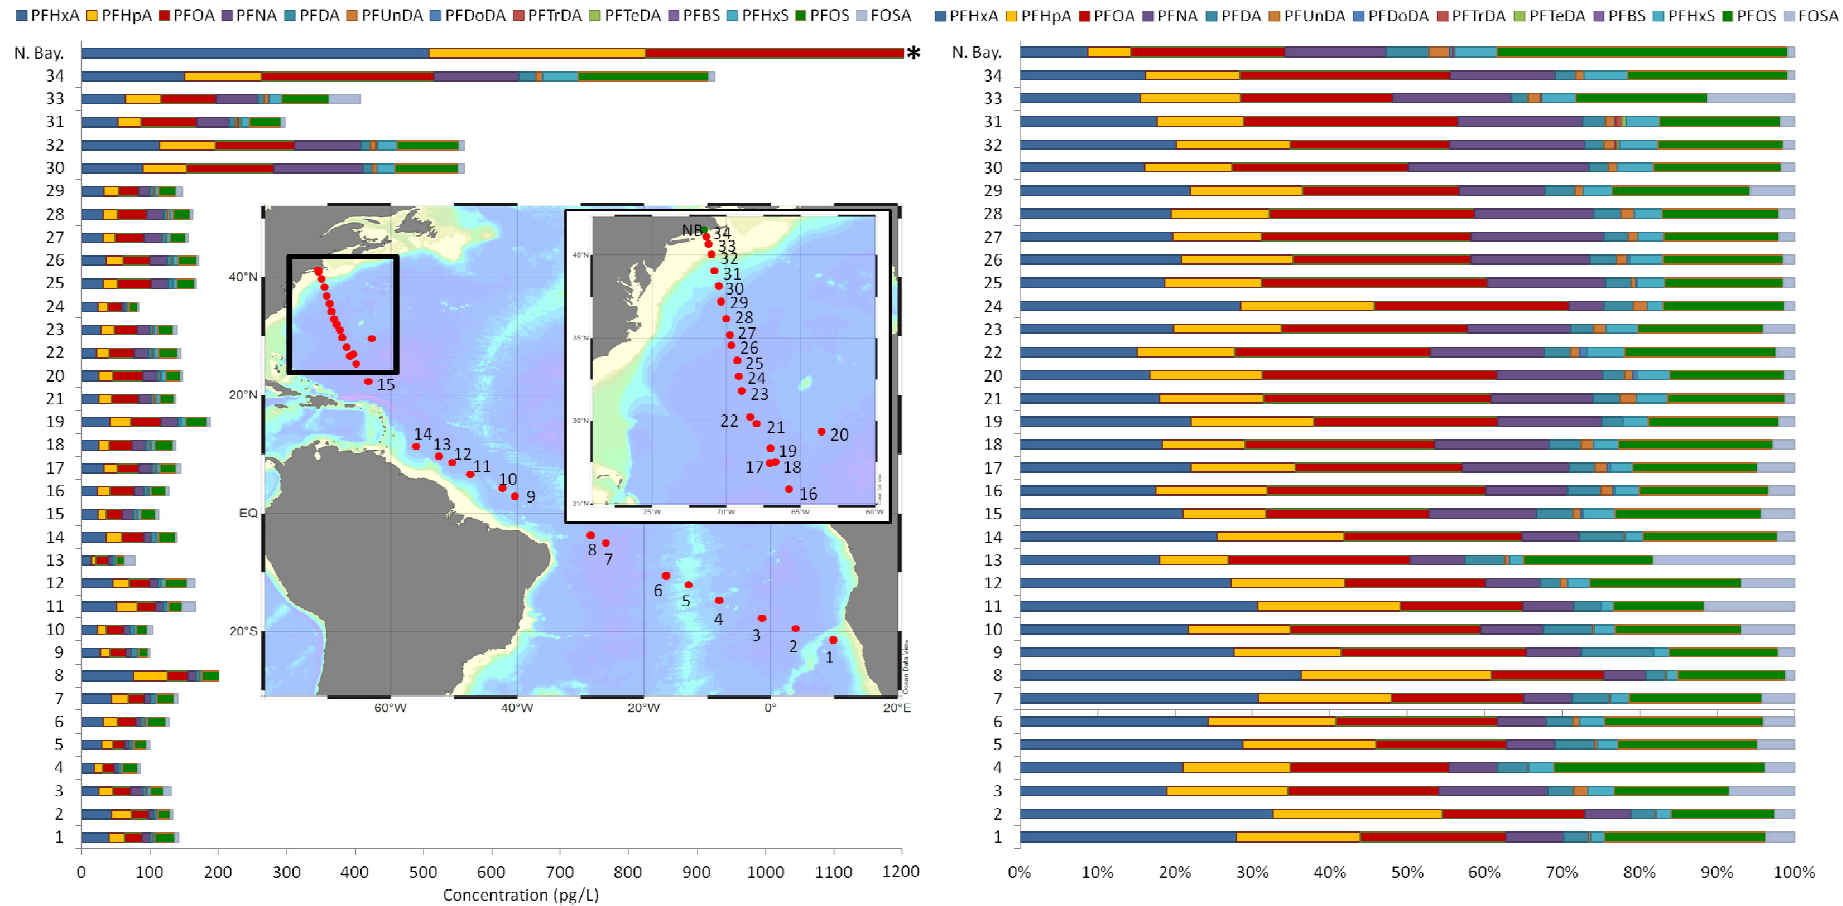

**Figure S3.**  $\Sigma$ PFAA concentrations (pg/L) and relative profile for 2009 *Endeavor* Cruise (Namibia to Narragansett, RI). \* $\Sigma$ PFAA concentration in Narragansett Bay is off-scale (5800 pg/L).



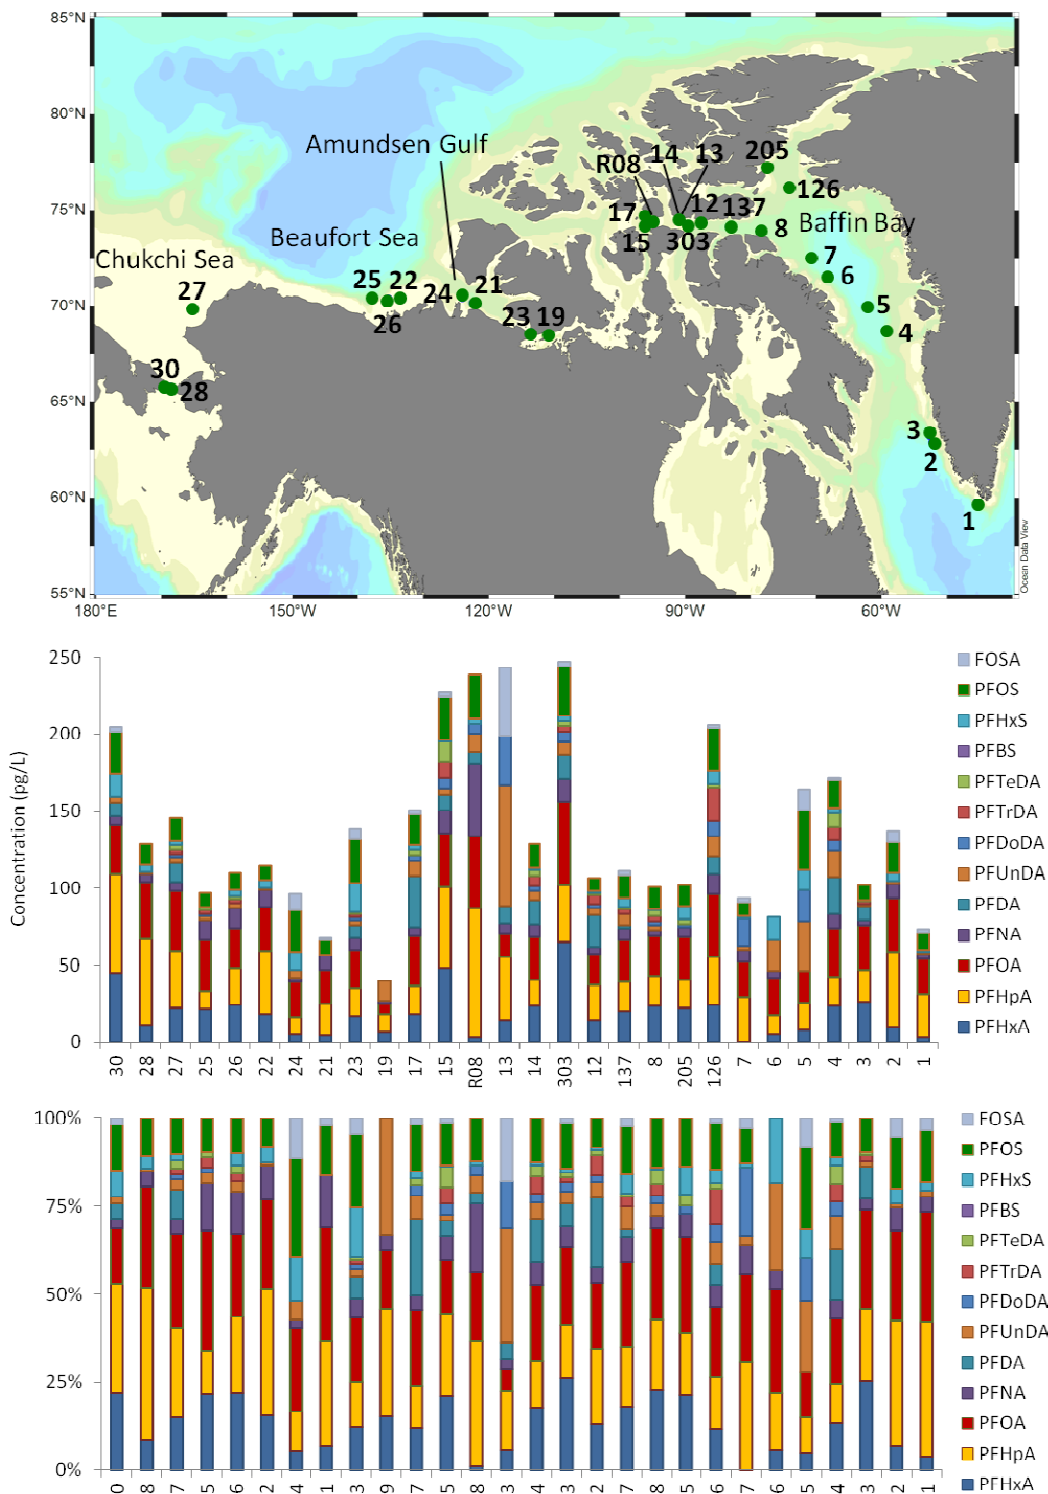

**Figure S4.**  $\Sigma$ PFAA concentrations (pg/L) and profiles for the 2005 *Oden* cruise (Greenland to Chukchi Sea; samples 1-30), and 2008 *Amundsen* cruise (North Baffin Bay; samples 126-303). R08 represents the average of 2 sites in Resolute Bay (n=2 samples/ site) sampled in 2008 and analyzed at CCIW as part of the CCIW/AIST interlaboratory study.

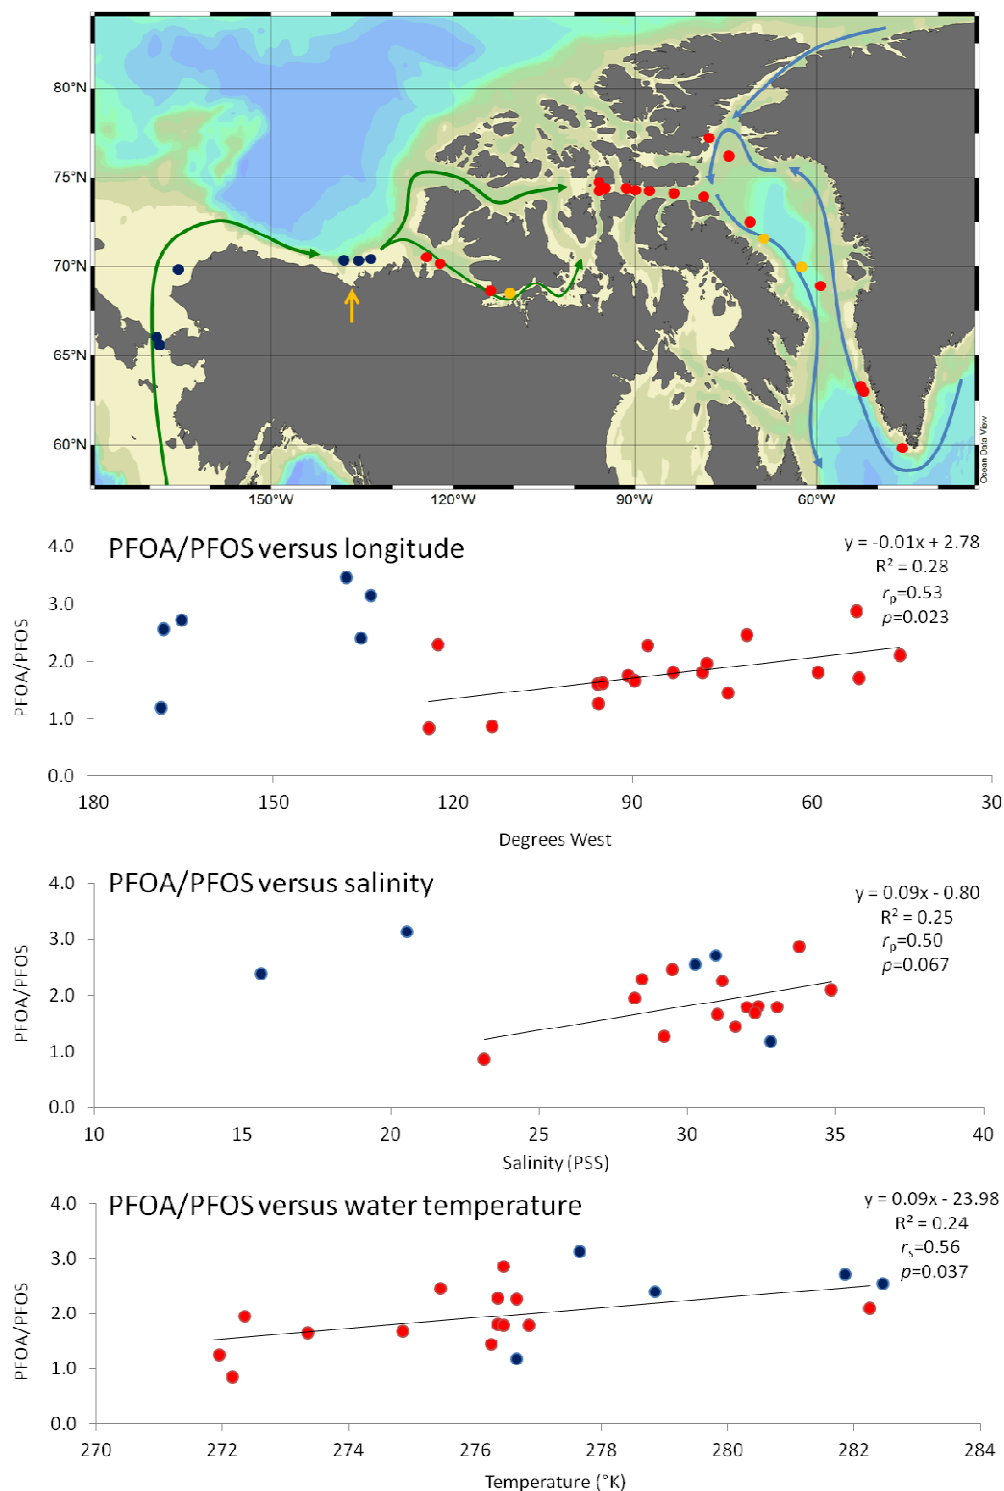

**Figure S5.** Linear regressions of PFOA/PFOS ratios versus longitude, salinity, and temperature. Blue circles, representing locations west of the Canadian Arctic Archipalego, were not included in regression or statistical analysis. Yellow circles indicate locations where PFOA/PFOS ratios could not be calculated due to non-detection of PFOS. Blue arrows represent water originating from the Atlantic while green arrows represent water originating from the Pacific. The Yellow arrow represents the location of the Mackenzie River, a major freshwater input into the Arctic Ocean.

1 **Table S1.** Abbreviations and chemical formulae for PFAAs examined in the present study.

| Abbreviation | Perfluorinated Compound     | Chemical Formula     |
|--------------|-----------------------------|----------------------|
| PFBS         | Perfluorobutane sulfonate   | $C_4F_9SO_3^-$       |
| PFHxS        | Perfluorohexane sulfonate   | $C_6F_{13}SO_3^-$    |
| PFOS         | Perfluorooctane sulfonate   | $C_8F_{17}SO_3^-$    |
| FOSA         | Perfluorooctane sulfonamide | $C_8F_{17}SO_2NH_2$  |
| PFHxA        | Perfluorohexanoate          | $C_5F_{11}CO_2^-$    |
| PFHpA        | Perfluoroheptanoate         | $C_6F_{13}CO_2^-$    |
| PFOA         | Perfluorooctanoate          | $C_7F_{15}CO_2^-$    |
| PFNA         | Perfluorononanoate          | $C_8F_{17}CO_2^-$    |
| PFDA         | Perfluorodecanoate          | $C_9F_{19}CO_2^-$    |
| PFUnDA       | Perfluoroundecanoate        | $C_{10}F_{21}CO_2^-$ |
| PFDoDA       | Perfluorododecanoate        | $C_{11}F_{23}CO_2^-$ |
| PFTriDA      | Perfluorotridecanoate       | $C_{12}F_{25}CO_2^-$ |
| PFTeDA       | Perfluorotetradecanoate     | $C_{13}F_{27}CO_2^-$ |

2  
3

1 **Table S2.** Comparison of PFAA concentrations (pg/L) in global surface waters with values from the present study

|                        |                                                                             | PFOS             | PFHxS           | PFHxA           | PFOA     | PFNA            | Reference                     |
|------------------------|-----------------------------------------------------------------------------|------------------|-----------------|-----------------|----------|-----------------|-------------------------------|
| Atlantic               | North Atlantic Ocean (>40°N)                                                | 8.6–36           | 4.1–6.1         | n.a.            | 160–338  | 15–36           | Yamashita et al. <sup>2</sup> |
|                        | Northeastern Atlantic Ocean                                                 | <10-291          | n.d.            | <5.7-127        | <4-229   | <5.1-107        | Ahrens et al. <sup>3</sup>    |
|                        | Northeastern Atlantic Ocean (40-49 °N)                                      | 45-110           | 8-27            | 38-57           | 77-154   | 5.4-38          | Ahrens et al. <sup>4</sup>    |
|                        | North to South Atlantic Ocean                                               | <14-170          | n.a.            | n.a.            | <17-90   | n.a.            | Theobald et al. <sup>5</sup>  |
|                        | Mid eastern Atlantic Ocean (40S-40 °N)                                      | 47-116           | 7-17            | <3-42           | <5.2-117 | <3-39           | Ahrens et al. <sup>4</sup>    |
|                        | Eastern Atlantic (27-46 °N)                                                 | 61-192           | 11-36           | 47-110          | 96-259   | 26-70           | This Study                    |
|                        | East Coast U.S. (38-41 °N) <sup>1</sup><br>(not including Narragansett Bay) | 46-191           | 13-51           | 53-150          | 80-252   | 48-131          | This Study                    |
|                        | Western Atlantic (3-37 °N)                                                  | 13-32            | 1-7             | 14-75           | 17-49    | 4-27            | This Study                    |
|                        | Mid Atlantic Ocean                                                          | <10-60           | n.d.            | <5.7            | <4-87    | <5.1-35         | Ahrens et al. <sup>3</sup>    |
|                        | Mid Atlantic Ocean                                                          | 37–73            | 2.6–12          | n.a.            | 100–439  | n.a.            | Yamashita et al. <sup>2</sup> |
|                        | Mid to Eastern Atlantic (0-24 °N)                                           | 30-78            | 1-17            | n.d.-51         | 23-89    | 3-22            | This Study                    |
|                        | South Atlantic Ocean                                                        | <10              | n.d.            | <5.7            | <4       | <5.1            | Ahrens et al., 2009a          |
|                        | Southeastern Atlantic (50-70 °S)                                            | <11-51           | <4.1            | <3              | <5.2     | <3              | Ahrens et al. <sup>4</sup>    |
|                        | Mid to southeastern Atlantic (3-21 °S)                                      | 18-30            | 2-5             | 18-75           | 17-30    | 5-19            | This Study                    |
|                        | Southwest Atlantic (5-52 °S)<br>(not including Rio de la Plata)             | 18-45            | n.d.-8          | 3-17            | 3-26     | 2-15            | This Study                    |
| Northern Seas          | Open North Sea                                                              | 120 <sup>2</sup> | 20 <sup>2</sup> | 40 <sup>2</sup> |          | 40 <sup>2</sup> | Theobald et al. <sup>6</sup>  |
|                        | North Sea (at 60°N,7°E)                                                     | ~25              | n.a.            | <5.7            | ~300     | n.a.            | Caliebe et al. <sup>7</sup>   |
|                        | Greenland Sea (75-80°N)                                                     | 12-32            | <2-20           | n.d.            | 25-80    | n.a.            | Caliebe et al. <sup>7</sup>   |
|                        | Norwegian Sea (72-75°N)                                                     | 25-80            | 5-16            | n.d.            | 45-60    | n.a.            | Caliebe et al. <sup>7</sup>   |
| Labrador and Greenland | East Greenland (AO-2 surface water)                                         | 20-40            | n.a.            | n.a.            | 50-55    | n.a.            | Yamashita et al. <sup>2</sup> |
|                        | NW Atlantic (east of Newfoundland)                                          | <10              | n.a.            | <5.7            | 40-81    | <5.1            | Ahrens et al. <sup>3</sup>    |
|                        | Labrador Sea (coastal)                                                      | 24-73            | 2.3-10          | n.a.            | 8-182    | <MDL            | Rosenberg et al. <sup>8</sup> |
| Arctic                 | Labrador Sea/ Davis Strait/ North Baffin Bay (59-77 °N)                     | n.d.-39          | n.d.-15         | 0.4-26          | 21-41    | n.d.-13         | This Study                    |
|                        | Canadian Arctic Archipelago (87-124 °W)                                     | n.d.-32          | n.d.-19         | 3-65            | 6-54     | 2-47            | This Study                    |
|                        | Chukchi Sea/Arctic Ocean                                                    | <21-53           | <66             | <27-28          | <20-67   | <22-51          | Cai et al. <sup>9</sup>       |
|                        | Beaufort Sea/Chukchi Sea/Bering Strait (137-169 °W)                         | 9-27             | n.d.-15         | 11-45           | 26-39    | 5-13            | This Study                    |
| Pacific                | Northwest Pacific Ocean and Bering Sea                                      | <21-60           | <66             | <27             | <20-100  | <22-70          | Cai et al. <sup>9</sup>       |
|                        | Western Pacific Ocean                                                       | 54–78            | 2.2–2.8         | n.a.            | 136–142  | n.a.            | Yamashita et al. <sup>2</sup> |
|                        | Central to Eastern Pacific Ocean                                            | 1.1–20           | 0.1–1.6         | n.a.            | 15–62    | 1.0–16          | Yamashita et al. <sup>2</sup> |
|                        | Central and South Pacific Ocean                                             | <5-21            | <5              | <5              | <5-7.0   | <5              | Wei et al. <sup>10</sup>      |
| Antarctic              | South Pacific Ocean                                                         | <5-11            | n.a.            | n.a.            | <5-11    | n.a.            | Yamashita et al. <sup>2</sup> |
|                        | Antarctic Region                                                            | <5-22.6          | <1              | <5              | <5       | <5              | Wei et al. <sup>10</sup>      |

2 <sup>1</sup> Narragansett Bay not included

3 <sup>2</sup> Median shown

1 **Table S3.** Mean internal standard % recoveries  $\pm$  standard error about the mean for individual sampling cruises

|                                                                                                     | $^{13}\text{C}_2\text{-PFHxA}$ | $^{13}\text{C}_4\text{-PFOA}$ | $^{13}\text{C}_5\text{-PFNA}$ | $^{13}\text{C}_2\text{-PFDA}$ | $^{13}\text{C}_2\text{-PFUnDA}$ | $^{13}\text{C}_2\text{-PFDODA}$ | $^{13}\text{C}_4\text{-PFOS}$ | $^{18}\text{O}_2\text{-PFHxS}$ |
|-----------------------------------------------------------------------------------------------------|--------------------------------|-------------------------------|-------------------------------|-------------------------------|---------------------------------|---------------------------------|-------------------------------|--------------------------------|
| <b>2009 Endeavor Cruise<sup>1</sup></b><br>(Namibia to Narragansett, RI, $n=35$ samples)            | 85 $\pm$ 2.0                   | 94 $\pm$ 2.0                  | 80 $\pm$ 1.4                  | 60 $\pm$ 1.3                  | 51 $\pm$ 1.0                    | 42 $\pm$ 2.2                    | 75 $\pm$ 1.4                  | 90 $\pm$ 1.5                   |
| <b>2007 Oden Cruise<sup>2</sup></b><br>(Bay of Biscay to Argentina, $n=60$ samples; 2 samples/site) | 120 $\pm$ 2.5                  | 100 $\pm$ 2.1                 | n.a.                          | 46 $\pm$ 2.1                  | 28 $\pm$ 1.4                    | 21 $\pm$ 0.9                    | 74 $\pm$ 3.0                  | 130 $\pm$ 3.4                  |
| <b>2005 Oden Cruise<sup>2</sup></b><br>(Greenland to Chukchi Sea, $n=23$ samples)                   | 120 $\pm$ 7.6                  | 130 $\pm$ 7.3                 | n.a.                          | 62 $\pm$ 5.5                  | 31 $\pm$ 4.1                    | 21 $\pm$ 2.8                    | 70 $\pm$ 4.6                  | 104 $\pm$ 7.6                  |
| <b>2008 Amundsen Cruise<sup>2</sup></b><br>(North Baffin Bay/ Lancaster Sound, $n=4$ samples)       | 110 $\pm$ 24                   | 130 $\pm$ 20                  | n.a.                          | 28 $\pm$ 6.0                  | 26 $\pm$ 5.5                    | 34 $\pm$ 7.4                    | 79 $\pm$ 16                   | 200 $\pm$ 27                   |
| <b>2008 Gjoa Haven<sup>3</sup></b><br>(Interlab study, analyzed by AIST, $n=2$ spiked samples)      | 92 $\pm$ 2.8                   | 102 $\pm$ 2.3                 | n.a.                          | 72 $\pm$ 3.0                  | n.a.                            | 8.0 $\pm$ 0.4                   | 95 $\pm$ 2.7                  | 120 $\pm$ 2.9                  |
| <b>2008 Gjoa Haven<sup>2</sup></b><br>(Interlab study, analyzed by CCIW, $n=2$ spiked samples)      | 100 $\pm$ 2.8                  | 95 $\pm$ 2.6                  | n.a.                          | 44 $\pm$ 2.6                  | 26 $\pm$ 4.3                    | 18 $\pm$ 2.9                    | 67 $\pm$ 3.6                  | 150 $\pm$ 4.3                  |
| <b>2008 Resolute Bay<sup>3</sup></b><br>(Interlab study, analyzed by AIST, $n=2$ spiked samples)    | 98 $\pm$ 3.0                   | 98 $\pm$ 3.9                  | n.a.                          | 76 $\pm$ 6.2                  | n.a.                            | 16 $\pm$ 14                     | 96 $\pm$ 1.3                  | 110 $\pm$ 0.02                 |
| <b>2008 Resolute Bay<sup>2</sup></b><br>(Interlab study, analyzed by CCIW, $n=2$ spiked samples)    | 120 $\pm$ 7.2                  | 88 $\pm$ 9.2                  | n.a.                          | 41 $\pm$ 9.4                  | 21 $\pm$ 4.7                    | 12 $\pm$ 1.6                    | 64 $\pm$ 7.8                  | 140 $\pm$ 16                   |

n.a.-not available at the time of analysis.

1.  $^{13}\text{C}_2\text{-PFOA}$ ,  $^{13}\text{C}_8\text{-PFOS}$ ,  $^{13}\text{C}_9\text{-PFNA}$ , and  $^{13}\text{C}_7\text{-PFUnDA}$  used as instrument performance standard.

2.  $^{13}\text{C}_2\text{-PFOA}$  used as instrument performance standard.

3.  $^{13}\text{C}_5\text{-PFNA}$ -used as instrument performance standard.

1 **Table S4.** Interlab comparison of 2008 Gjoa Haven (68°37'N, 95°52'W) and 2008 Resolute Bay (74°43'N, 94°58'W) water samples.

| Lab                               | Year | Sample (depth)                  | rep | Congener (MRM transition) |                    |                   |                   |                   |                     |                     |                   |                               |                   |
|-----------------------------------|------|---------------------------------|-----|---------------------------|--------------------|-------------------|-------------------|-------------------|---------------------|---------------------|-------------------|-------------------------------|-------------------|
|                                   |      |                                 |     | PFHxA<br>(313/269)        | PFHpA<br>(363/319) | PFOA<br>(413/369) | PFNA<br>(463/419) | PFDA<br>(513/469) | PFUnDA<br>(563/519) | PFDaDA<br>(613/569) | PFHxS<br>(399/99) | PFOS <sup>4</sup><br>(499/99) | FOSA<br>(498/78)  |
| CCIW                              | 2008 | Gjoa Haven (6 m) <sup>3</sup>   | 1   | 58                        | 112 <sup>7</sup>   | 217               | 59                | 57                | 1.0                 | 5.6                 | 4.1               | 14                            | <1.0 <sup>5</sup> |
| CCIW                              | 2008 | Gjoa Haven (6 m) <sup>3</sup>   | 2   | 40                        | 108                | 211               | 51                | 43                | 1.0                 | 6.4                 | 3.9               | 20                            | 2.3               |
|                                   |      | Average                         |     | 49                        | 110                | 214               | 55                | 50                | 1.0                 | 6.0                 | 4.0               | 17                            | 1.7               |
| CCIW                              | 2008 | Gjoa Haven (6 m)                | 1   | 74                        | 21                 | 304               | 302               | 11                | 0.3                 | 0.5                 | 9.2               | 180                           | <1.0              |
| CCIW                              | 2008 | Gjoa Haven (6 m)                | 2   | 80                        | 23                 | 348               | 352               | 17                | 7.7                 | 3.5                 | 0.8               | <2.0 <sup>6</sup>             | <1.0              |
|                                   |      | Average                         |     | 77                        | 22                 | 326               | 327               | 14                | 4.0                 | 2.0                 | 5.0               | 180                           | <1.0              |
| AIST                              | 2008 | Gjoa Haven (6 m)                | 1   | 78                        | 162                | 499               | 103               | 48                | 4.5                 | 1.1                 | 8.2               | 24                            |                   |
| AIST                              | 2008 | Gjoa Haven (6 m)                | 2   | 69                        | 151                | 472               | 100               | 43                | 3.3                 | 1.0                 | 3.1               | 23                            |                   |
|                                   |      | Average                         |     | 73                        | 156                | 485               | 101               | 45                | 3.9                 | 1.1                 | 5.6               | 24                            |                   |
| AIST                              | 2008 | Gjoa Haven (6 m) <sup>3</sup>   | 1   | 76                        | 158                | 468               | 95                | 54                | 3.6                 | 0.2                 | 11                | 23                            |                   |
| AIST                              | 2008 | Gjoa Haven (6 m) <sup>3</sup>   | 2   | 85                        | 168                | 527               | 100               | 55                | 5.3                 | 2.0                 | 14                | 25                            |                   |
|                                   |      | Average                         |     | 81                        | 163                | 497               | 97                | 55                | 4.4                 | 1.1                 | 12                | 24                            |                   |
| <b>average interlab deviation</b> |      |                                 |     | <b>18%</b>                | <b>59%</b>         | <b>45%</b>        | <b>-92%</b>       | <b>36%</b>        | <b>40%</b>          | <b>-266%</b>        | <b>49%</b>        | <b>27%</b>                    |                   |
| CCIW                              | 2008 | Resolute Bay (6 m) <sup>3</sup> | 1   | 5.2                       | 31                 | 45                | 35                | 11                | 27                  | 13                  | 5.2               | 19                            | 3.0               |
| CCIW                              | 2008 | Resolute Bay (6 m) <sup>3</sup> | 2   | 4.8                       | 29                 | 43                | 49                | 8.9               | 13                  | 8.6                 | 4.8               | 31                            | <1.0              |
|                                   |      | Average                         |     | 5.0                       | 30                 | 44                | 42                | 10                | 20                  | 11                  | 5.0               | 25                            | 2.0               |
| CCIW                              | 2008 | Resolute Bay (6 m)              | 1   | <2.0                      | 137                | 51                | 45                | 1.0               | 1.6                 | <2.0                | <2.0              | <2.0                          | <1.0              |
| CCIW                              | 2008 | Resolute Bay (6 m)              | 2   | <2.0                      | 137                | 49                | 57                | 9.0               | 6.4                 | 3.7                 | <2.0              | <2.0                          | <1.0              |
|                                   |      | Average                         |     | 2.0                       | 137                | 50                | 51                | 5.0               | 4.0                 | 2.9                 | 2.0               | 2.0                           | 1.0               |
| AIST                              | 2008 | Resolute Bay (6 m)              | 1   | 17                        | 43                 | 78                | 62                | 8.6               | 8.5                 | 0.9                 | 6.6               | 17                            |                   |
| AIST                              | 2008 | Resolute Bay (6 m)              | 2   | 17                        | 42                 | 88                | 66                | 7.5               | 9.0                 | <1.0                | 6.0               | 17                            |                   |
|                                   |      | Average                         |     | 17                        | 43                 | 83                | 64                | 8.1               | 8.8                 | 0.4                 | 6.3               | 17                            |                   |
| AIST                              | 2008 | Resolute Bay (6 m) <sup>3</sup> | 1   | 26                        | 42                 | 92                | 69                | 10                | 12                  | 0.2                 | 6.2               | 18                            |                   |
| AIST                              | 2008 | Resolute Bay (6 m) <sup>3</sup> | 2   | 23                        | 46                 | 68                | 58                | 14                | 13                  | 2.8                 | 4.2               | 14                            |                   |
|                                   |      | Average                         |     | 25                        | 44                 | 80                | 64                | 12                | 12.5                | 1.5                 | 5.2               | 16                            |                   |
| <b>average interlab deviation</b> |      |                                 |     | <b>83%</b>                | <b>-93%</b>        | <b>42%</b>        | <b>27%</b>        | <b>26%</b>        | <b>-13%</b>         | <b>-605%</b>        | <b>39%</b>        | <b>18%</b>                    |                   |

<sup>1</sup>CCIW = Canada Centre for Inland Waters (Environment Canada, Aquatic Ecosystem Protection Research Division Burlington, ON Canada).

<sup>2</sup>AIST = National Institute of Advanced Industrial Science and Technology, Tsukuba, Ibaraki 305-8569, Japan

<sup>3</sup> these samples pre-spiked with <sup>13</sup>C-PFAAs at CCIW prior to analysis by both labs

<sup>4</sup> Sum of branched + linear isomers

<sup>5</sup> Unless otherwise specified, values below the MDL were set to the MDL for calculation of means.

<sup>6</sup> This value not included in the calculation of average deviation for this sample.

<sup>7</sup> Where three digits are provided the last digit is non-significant and is included for illustrative purposes only.

1 **Table S5.** Interlab comparison of 2009 Resolute Bay (74°43'N, 94°58'W) water samples (not spiked with isotope-labeled standards)

| Lab                        | Year | Sample (depth)       | rep | Congener (MRM transition) |                    |                   |                   |                   |                     |                     |                   |                               |                                |                               |                  |
|----------------------------|------|----------------------|-----|---------------------------|--------------------|-------------------|-------------------|-------------------|---------------------|---------------------|-------------------|-------------------------------|--------------------------------|-------------------------------|------------------|
|                            |      |                      |     | PFHxA<br>(313/269)        | PFHpA<br>(363/319) | PFOA<br>(413/369) | PFNA<br>(463/419) | PFDA<br>(513/469) | PFUnDA<br>(563/519) | PFDoDA<br>(613/569) | PFHxS<br>(399/99) | PFOS <sup>3</sup><br>(499/99) | PFHpS <sup>4</sup><br>(449/80) | PFDS <sup>5</sup><br>(599/80) | FOSA<br>(498/78) |
| CCIW <sup>1</sup>          | 2009 | Resolute Bay (0.5 m) | 1   | 49                        | 3.7                | 48                | 33                | 6.2               | 6                   | 0.1                 | 18                | 16                            |                                |                               | 1.4              |
| CCIW                       | 2009 | Resolute Bay (0.5 m) | 2   | 38                        | 3.4                | 35                | 21                | 4.2               | 3.8                 | 0.3                 | 16                | 13                            |                                |                               | 1.5              |
| CCIW                       | 2009 | Resolute Bay (0.5 m) | 3   | 43                        | 3.9                | 42                | 30                | 6.1               | 5.8                 | 1.6                 | 18                | 18                            |                                |                               | 0.8              |
|                            |      | Average              |     | 43                        | 3.7                | 42                | 28                | 5.5               | 5.2                 | 0.7                 | 17                | 16                            |                                |                               | 1.2              |
|                            |      | (CVr)                |     | 13%                       | 7%                 | 15%               | 22%               | 21%               | 24%                 | 119%                | 5%                | 15%                           |                                |                               | 32%              |
| AIST <sup>2</sup>          | 2009 | Resolute Bay (0.5 m) | 1   | 64                        | 44                 | 60                | 9.3               | 9                 | 1.4                 | 1.7                 | 25                | 24                            | 9.4                            | 8.1                           |                  |
| AIST                       | 2009 | Resolute Bay (0.5 m) | 2   | 69                        | 52                 | 84                | 27                | 11                | 1.6                 | <1.0                | 33                | 28                            | 6.3                            | 7.6                           |                  |
| AIST                       | 2009 | Resolute Bay (0.5 m) | 3   | 73                        | 49                 | 61                | 7.1               | 6.7               | 1.3                 | 1.3                 | 19                | 21                            | 11                             | 6.6                           |                  |
|                            |      | Average              |     | 68                        | 49                 | 68                | 14                | 8.9               | 1.5                 | 1.0 <sup>6</sup>    | 25                | 25                            | 8.8                            | 7.4                           |                  |
|                            |      | (CVr)                |     | 7%                        | 8%                 | 20%               | 75%               | 25%               | 11%                 | 89%                 | 26%               | 14%                           | 26%                            | 10%                           |                  |
| average interlab deviation |      |                      |     | 37%                       | 37%                | 92%               | 39%               | -94%              | 39%                 | -256%               | 33%               | 31%                           | 37%                            |                               |                  |

2 <sup>1</sup>CCIW = Canada Centre for Inland Waters (Environment Canada, Aquatic Ecosystem Protection Research Division Burlington, ON  
3 Canada);

4 <sup>2</sup>AIST = National Institute of Advanced Industrial Science and Technology, Tsukuba, Ibaraki 305-8569, Japan

5 <sup>3</sup>Sum of branched + linear isomers

6 <sup>4</sup>Perfluoroheptane sulfonate (PFHpS, C<sub>7</sub>F<sub>15</sub>SO<sub>3</sub><sup>-</sup>) was also analyzed by AIST for 2009 samples.

7 <sup>5</sup>Perfluorodecane sulfonate (PFDS, C<sub>10</sub>F<sub>21</sub>SO<sub>3</sub><sup>-</sup>) was also analyzed by AIST for 2009 samples.

8 <sup>6</sup>A value of zero was used for calculation of the mean.

9  
10

**Table S6.** Region of sample collection, coordinates, date of collection, depth, and sampling technique utilized for 2005 *Oden* Cruise through the Bering Strait to Southern Greenland.

| Ocean              | Region          | Nearby<br>Rivers/sources | Date      | Code | Latitude   | Longitude   | depth (m) | Sampler | Water<br>Temp (°K) | Salinity<br>(psu) |
|--------------------|-----------------|--------------------------|-----------|------|------------|-------------|-----------|---------|--------------------|-------------------|
| Northwest Atlantic | Labrador Sea    | -                        | 11-Jul-05 | 1    | 59°46.00'N | 45°25.20'W  | 8         | in line | 282                | 35                |
| Arctic             | Davis Strait    | -                        | 12-Jul-05 | 2    | 62°53.41'N | 52°14.42'W  | 8         | in line | 275                | 32                |
| Arctic             | Davis Strait    | -                        | 13-Jul-05 | 3    | 63°12.48'N | 52°35.84'W  | 8         | in line | 276                | 34                |
| Arctic             | Baffin Bay      | -                        | 15-Jul-05 | 4    | 68°47.23'N | 59°7.79'W   | 8         | in line | 276                | 33                |
| Arctic             | Baffin Bay      | -                        | 15-Jul-05 | 5    | 69°56.13'N | 62°05.01'W  | 8         | in line | 272                | 30                |
| Arctic             | Baffin Bay      | -                        | 16-Jul-05 | 6    | 71°35.27'N | 68°17.22'W  | 8         | in line | 275                | 29                |
| Arctic             | Baffin Bay      | -                        | 16-Jul-05 | 7    | 72°27.05'N | 70°55.56'W  | 8         | in line | 275                | 29                |
| Arctic             | Baffin Bay      | -                        | 17-Jul-05 | 8    | 73°50.29'N | 78°17.35'W  | 8         | in line | 276                | 32                |
| Arctic             | Lancaster Sound | -                        | 17-Jul-05 | 12   | 74°16.04'N | 87°29.60'W  | 8         | in line | 277                | 31                |
| Arctic             | Lancaster Sound | -                        | 17-Jul-05 | 13   | 74°25.67'N | 90°0.81'W   | 8         | in line | 272                | 29                |
| Arctic             | Lancaster Sound | -                        | 17-Jul-05 | 14   | 74°25.67'N | 90°0.81'W   | 8         | in line | n.a.               | n.a.              |
| Arctic             | Barrow Strait   | -                        | 18-Jul-05 | 15   | 74°10.77'N | 95°40.15'W  | 8         | in line | 272                | 29                |
| Arctic             | Barrow Strait   | -                        | 18-Jul-05 | 17   | 74°42.19'N | 95°47.64'W  | 20        | Rosette | n.a.               | n.a.              |
| Arctic             | Victoria Strait | -                        | 25-Jul-05 | 19   | 68°25.80'N | 110°38.88'W | 8         | in line | 274                | 28                |
| Arctic             | Amundsen Gulf   | -                        | 26-Jul-05 | 21   | 70°9.18'N  | 122°28.98'W | 8         | in line | 276                | 28                |
| Arctic             | Mackenzie Bay   | Near Mackenzie R.        | 27-Jul-05 | 22   | 70°28.43'N | 133°43.38'W | 8         | in line | 278                | 21                |
| Arctic             | Coronation Gulf | -                        | 25-Jul-05 | 23   | 68°38.20'N | 113°31.98'W | 8         | in line | 272                | 23                |
| Arctic             | Amundsen Gulf   | -                        | 26-Jul-05 | 24   | 70°24.12'N | 124°4.86'W  | 32        | Rosette | n.a.               | n.a.              |
| Arctic             | Mackenzie Bay   | Near Mackenzie R.        | 27-Jul-05 | 25   | 70°27.00'N | 137°51.66'W | 2         | Rosette | n.a.               | n.a.              |
| Arctic             | Mackenzie Bay   | Near Mackenzie R.        | 27-Jul-05 | 26   | 70°22.46'N | 135°18.66'W | 8         | in line | 279                | 16                |
| Arctic             | Chukchi Sea     | -                        | 31-Jul-05 | 27   | 69°53.61'N | 165°15.66'W | 8         | in line | 282                | 31                |
| Arctic             | Bering Strait   | -                        | 1-Aug-05  | 28   | 65°41.58'N | 168°22.50'W | 8         | in line | 282                | 30                |
| Arctic             | Bering Strait   | -                        | 5-Aug-05  | 30   | 65°46.35'N | 168°40.56'W | 8         | in line | 277                | 33                |

n.a.-not available



**Table S7.** Region of sample collection, coordinates, date of collection, depth, and sampling technique utilized for 2008 *Amundsen* Cruise in North Baffin Bay/Lancaster Sound.

| Ocean  | Region          | Nearby<br>Rivers/sources | Date      | Code | Latitude    | Longitude  | depth (m) | Sampler | Water Temp (°K) | Salinity<br>(psu) |
|--------|-----------------|--------------------------|-----------|------|-------------|------------|-----------|---------|-----------------|-------------------|
| Arctic | Lancaster Sound | -                        | 07-Sep-08 | 303  | 74°14.23'N  | 89°40.20'W | surface   | pail    | 273             | 31                |
| Arctic | Lancaster Sound | -                        | 10-Sep-08 | 137  | 74° 56.20'N | 69°04.20'W | surface   | pail    | 277             | 32                |
| Arctic | Baffin Bay      | -                        | 16-Sep-08 | 205  | 77°9.95'N   | 77°42.60'W | surface   | pail    | 272             | 28                |
| Arctic | Baffin Bay      | -                        | 18-Sep-08 | 126  | 77°20.69'N  | 73°25.68'W | surface   | pail    | 276             | 32                |

**Table S8.** Region of sample collection, coordinates, date of collection, depth, and sampling technique utilized for 2007 *Oden* Cruise from the Bay of Biscay to Argentina.

| Ocean          | Region                 | Nearby Rivers/sources   | Date      | Code | Latitude   | Longitude    | depth (m) | Sampler | Water Temp (°K) | Salinity (psu) |
|----------------|------------------------|-------------------------|-----------|------|------------|--------------|-----------|---------|-----------------|----------------|
| North Atlantic | Northeast Atlantic     | Bay of Biscay           | 26-Oct-07 | 1    | 45°49.31'N | 08°14.48'W   | 8         | in line | 290             | 35             |
| North Atlantic | East Atlantic          | -                       | 27-Oct-07 | 2    | 42°10.70'N | 10°35.25'W   | 8         | in line | 291             | 35             |
| North Atlantic | East Atlantic          | -                       | 27-Oct-07 | 3    | 38°48.52'N | 12°38.22'W   | 8         | in line | 293             | 36             |
| North Atlantic | East Atlantic          | -                       | 28-Oct-07 | 4    | 34°39.98'N | 15°03.90'W   | 8         | in line | 294             | 36             |
| North Atlantic | East Atlantic          | Near Madeiras           | 29-Oct-07 | 5    | 31°02.58'N | 17°53.77'W   | 8         | in line | 293             | 37             |
| North Atlantic | East Atlantic          | Near Canary Is          | 30-Oct-07 | 6    | 27°18.35'N | 19°00.30'W   | 8         | in line | 294             | 37             |
| North Atlantic | East Atlantic          | -                       | 31-Oct-07 | 7    | 23°36.61'N | 20°33.85'W   | 8         | in line | 296             | 37             |
| North Atlantic | East Atlantic          | -                       | 1-Nov-07  | 8    | 22°38.90'N | 22°17.13'W   | 8         | in line | 297             | 37             |
| North Atlantic | East Atlantic          | Near Cape Verde         | 2-Nov-07  | 10   | 12°17.22'N | 25°12.85'W   | 8         | in line | 301             | 36             |
| North Atlantic | Mid Atlantic           | -                       | 4-Nov-07  | 11   | 08°27.06'N | 26°48.55'W   | 8         | in line | 301             | 36             |
| South Atlantic | Mid Atlantic           | -                       | 6-Nov-07  | 14   | 00°03.78'S | 30°18.29'W   | 8         | in line | 300             | 36             |
| South Atlantic | South western Atlantic | -                       | 8-Nov-07  | 16   | 05°11.34'S | 32°02.88'W   | 8         | in line | 300             | 37             |
| South Atlantic | South western Atlantic | Near Recife             | 9-Nov-07  | 17   | 08°09.58'S | 32°56.63'W   | 8         | in line | 299             | 37             |
| South Atlantic | South western Atlantic | -                       | 10-Nov-07 | 18   | 11°21.66'S | 34°28.60'W   | 8         | in line | 300             | 37             |
| South Atlantic | South western Atlantic | -                       | 11-Nov-07 | 19   | 15°03.94'S | 36°02.96'W   | 8         | in line | 300             | 38             |
| South Atlantic | South western Atlantic | -                       | 12-Nov-07 | 20   | 19°05.91'S | 37°32.86'W   | 8         | in line | 299             | 37             |
| South Atlantic | South western Atlantic | -                       | 13-Nov-07 | 21   | 22°40.12'S | 39°42.58'W   | 8         | in line | 298             | 36             |
| South Atlantic | South western Atlantic | Near Rio de Janeiro     | 14-Nov-07 | 22   | 25°28.11'S | 42°40.17'W   | 8         | in line | 297             | 36             |
| South Atlantic | South western Atlantic | -                       | 16-Nov-07 | 23   | 28°55.05'S | 46°33.50'W   | 8         | in line | 295             | 36             |
| South Atlantic | South western Atlantic | -                       | 17-Nov-07 | 24   | 58°09.00'S | 50° 07. 60'W | 8         | in line | 294             | 36             |
| South Atlantic | South western Atlantic | East of Rio de la Plata | 18-Nov-07 | 25   | 34°48.59'S | 53°50.95'W   | 8         | in line | 290             | 34             |
| South Atlantic | South western Atlantic | East of Rio de la Plata | 20-Nov-07 | 26   | 35°25.08'S | 55°04.02'W   | 8         | in line | 291             | 34             |
| South Atlantic | South western Atlantic | -                       | 21-Nov-07 | 27   | 39°08.50'S | 57°15.05'W   | 8         | in line | 285             | 35             |
| South Atlantic | South western Atlantic | -                       | 22-Nov-07 | 28   | 42°38.80'S | 60° 59.90'W  | 8         | in line | 285             | 35             |
| South Atlantic | South western Atlantic | -                       | 24-Jan-07 | 29   | 48°41.02'S | 65°42.07'W   | 8         | in line | 283             | 34             |
| South Atlantic | South western Atlantic | Near Rio Gallegos       | 25-Nov-07 | 30   | 51°56.02'S | 67°34.06'W   | 8         | in line | 283             | 34             |

**Table S9.** Region of sample collection, coordinates, date of collection, depth, and sampling technique utilized for 2009 *Endeavor* Cruise from Namibia to Rhode Island.

| Ocean          | Region                 | Nearby Rivers/sources | Date      | Code | Latitude   | Longitude  | depth (m) | Sampler | Water Temp (°K) | Salinity (psu) |
|----------------|------------------------|-----------------------|-----------|------|------------|------------|-----------|---------|-----------------|----------------|
| North Atlantic | Narragansett Bay       | Narragansett          | 3-Aug-09  | NB   | 41°29.53'N | 71°25.12'W | 8         | in line | n.a.            | n.a.           |
| North Atlantic | Western Atlantic       | Rhode Is Sound        | 29-Jul-09 | 34   | 41°14.61'N | 71°20.81'W | 8         | in line | 294             | 31             |
| North Atlantic | Western Atlantic       | -                     | 28-Jul-09 | 33   | 40°51.39'N | 71°17.42'W | 8         | in line | 294             | 33             |
| North Atlantic | Western Atlantic       | -                     | 28-Jul-09 | 32   | 39°57.21'N | 71°00.64'W | 8         | in line | 298             | 34             |
| North Atlantic | Western Atlantic       | -                     | 28-Jul-09 | 31   | 39°02.17'N | 70°45.28'W | 8         | in line | 297             | 36             |
| North Atlantic | Western Atlantic       | -                     | 28-Jul-09 | 30   | 38°09.84'N | 70°31.74'W | 8         | in line | 298             | 35             |
| North Atlantic | Western Atlantic       | -                     | 27-Jul-09 | 29   | 37°17.93'N | 70°15.93'W | 8         | in line | 301             | 36             |
| North Atlantic | Western Atlantic       | -                     | 27-Jul-09 | 28   | 36°14.66'N | 70°00.74'W | 8         | in line | 300             | 36             |
| North Atlantic | Western Atlantic       | -                     | 27-Jul-09 | 27   | 35°20.38'N | 69°47.37'W | 8         | in line | 300             | 36             |
| North Atlantic | Sargasso Sea           | -                     | 27-Jul-09 | 26   | 34°33.61'N | 69°33.45'W | 8         | in line | 300             | 36             |
| North Atlantic | Sargasso Sea           | -                     | 26-Jul-09 | 25   | 33°38.29'N | 69°17.74'W | 8         | in line | 301             | 36             |
| North Atlantic | Sargasso Sea           | -                     | 26-Jul-09 | 24   | 32°48.67'N | 69°7.71'W  | 8         | in line | 301             | 36             |
| North Atlantic | Sargasso Sea           | -                     | 26-Jul-09 | 23   | 31°53.78'N | 68°51.07'W | 8         | in line | 301             | 37             |
| North Atlantic | Sargasso Sea           | -                     | 26-Jul-09 | 22   | 30°54.13'N | 68°28.29'W | 8         | in line | 301             | 37             |
| North Atlantic | Sargasso Sea           | -                     | 25-Jul-09 | 21   | 29°59.90'N | 67°59.61'W | 8         | in line | 302             | 37             |
| North Atlantic | Sargasso Sea           | -                     | 25-Jul-09 | 20   | 29°26.12'N | 63°37.05'W | 8         | in line | 302             | 36             |
| North Atlantic | Sargasso Sea           | -                     | 25-Jul-09 | 19   | 28°20.60'N | 67°01.61'W | 8         | in line | 301             | 37             |
| North Atlantic | Sargasso Sea           | -                     | 25-Jul-09 | 18   | 27°32.92'N | 66°33.30'W | 8         | in line | 302             | 37             |
| North Atlantic | Sargasso Sea           | -                     | 25-Jul-09 | 17   | 26°44.39'N | 66°52.25'W | 8         | in line | 302             | 37             |
| North Atlantic | Sargasso Sea           | -                     | 24-Jul-09 | 16   | 25°50.26'N | 65°36.38'W | 8         | in line | 303             | 37             |
| North Atlantic | South western Atlantic | -                     | 23-Jul-09 | 15   | 22°26.30'N | 63°49.22'W | 8         | in line | 302             | 37             |
| North Atlantic | South western Atlantic | North of Amazon R.    | 18-Jul-09 | 14   | 11°24.70'N | 56°27.60'W | 8         | in line | 302             | 30             |
| North Atlantic | South western Atlantic | North of Amazon R.    | 17-Jul-09 | 13   | 09°32.16'N | 52°49.48'W | 8         | in line | 302             | 29             |
| North Atlantic | South western Atlantic | North of Amazon R.    | 16-Jul-09 | 12   | 08°28.00'N | 50°53.64'W | 8         | in line | 303             | 25             |
| North Atlantic | South western Atlantic | North of Amazon R.    | 15-Jul-09 | 11   | 06°31.76'N | 47°21.85'W | 8         | in line | 302             | 34             |
| North Atlantic | South western Atlantic | -                     | 14-Jul-09 | 10   | 04°04.46'N | 42°59.36'W | 8         | in line | 301             | 36             |
| North Atlantic | South western Atlantic | -                     | 13-Jul-09 | 9    | 03°05.09'N | 41°14.86'W | 8         | in line | 301             | 36             |
| South Atlantic | Mid Atlantic           | -                     | 11-Jul-09 | 8    | 03°52.77'S | 29°04.02'W | 8         | in line | 300             | 36             |
| South Atlantic | Mid Atlantic           | -                     | 10-Jul-09 | 7    | 04°51.36'S | 27°20.67'W | 8         | in line | 301             | 36             |
| South Atlantic | Central South Atlantic | -                     | 8-Jul-09  | 6    | 10°21.18'S | 17°20.76'W | 8         | in line | 300             | 36             |
| South Atlantic | Central South Atlantic | -                     | 7-Jul-09  | 5    | 12°00.57'S | 13°45.80'W | 8         | in line | 299             | 37             |
| South Atlantic | Central South Atlantic | -                     | 6-Jul-09  | 4    | 14°05.87'S | 09°39.17'W | 8         | in line | 297             | 37             |
| South Atlantic | Central South Atlantic | -                     | 4-Jul-09  | 3    | 17°34.40'S | 00°58.20'W | 8         | in line | 294             | 36             |
| South Atlantic | South East Atlantic    | -                     | 3-Jul-09  | 2    | 19°06.10'S | 03°27.30'E | 8         | in line | 294             | 36             |
| South Atlantic | South East Atlantic    | -                     | 2-Jul-09  | 1    | 21°11.00'S | 09°16.00'E | 8         | in line | 292             | 35             |

n.a.-not available

**Table S10.** Results for analysis of lab water blanks, field blanks and MDL estimates for seawater sampling (pg/L). PFBS, PFTrDA, and PFTeDA were not detected in blanks, therefore MDLs are concentrations producing a signal to noise ratio of greater than 3.

| Cruise                                   | Sample name                       | PFHxA | PFHpA | PFOA | PFNA | PFDA | PFUnDA | PFDODA | ΣPFOS | PFHxS | FOSA |
|------------------------------------------|-----------------------------------|-------|-------|------|------|------|--------|--------|-------|-------|------|
| <i>Endeavor</i> –<br>Atlantic (2009)     | average stay blank <sup>1</sup>   | 35    | 22    | 12   | 4.3  | 2.4  | 1.0    | 0.5    | 7.0   | 1.1   | 2.2  |
|                                          | average travel blank <sup>1</sup> | 43    | 27    | 19   | 6.3  | 2.7  | 1.1    | 0.2    | 2.7   | 1.3   | 3.2  |
|                                          | deviation                         | 21%   | 25%   | 65%  | 46%  | 11%  | 12%    | -54%   | -62%  | 19%   | 46%  |
|                                          | Blank                             | 2.8   | 0.87  | 3.1  | 0.62 | 0.39 | 1.3    | 0.06   | 0.74  | 0.48  | 0.92 |
|                                          | MDL                               | 5.4   | 1.9   | 7.1  | 1.5  | 1.1  | 3.1    | 0.10   | 2.5   | 1.3   | 2.1  |
| <i>Oden</i> – Atlantic<br>(2007)         | Blank                             | 2.6   | 1.6   | 3.7  | 2.1  | 5.6  | 1.3    | 1.7    | 6.1   | 1.6   | 0.7  |
|                                          | MDL                               | 4.6   | 3.1   | 5.7  | 3.6  | 25   | 3.3    | 3.9    | 19    | 4.1   | 1.6  |
| <i>Oden</i> – Arctic<br>(2005)           | Blank                             | 1.0   | 1.0   | 1.5  | 0.3  | 1.8  | 0.5    | 0.6    | 1.5   | 0.7   | 0.7  |
|                                          | MDL                               | 2.4   | 5.3   | 2.6  | 0.5  | 8.2  | 0.7    | 1.1    | 4.1   | 2.1   | 1.3  |
| <i>Amundsen</i> – North<br>Baffin (2008) | Blank                             | 23    | 11    | 18   | 5.7  | 10.4 | 4.4    | 5.9    | 32    | 2.9   | 0.6  |
|                                          | MDL                               | 11    | 4.0   | 6.0  | 5.0  | 6.8  | 4.3    | 1.6    | 5.5   | 1.1   | 1.1  |
| Resolute from<br>under ice (2008)        | Blank                             | 2.4   | 4.5   | 5.0  | 2.3  | 2.7  | 0.98   | 2.7    | 8.0   | 1.2   | 2.2  |
|                                          | MDL                               | 0.26  | 2.4   | 3.5  | 2.9  | 7.3  | 4.2    | 3.9    | 1.6   | 2.4   | 6.8  |

<sup>1</sup>Stay blank refers to the same stock of water that was used as the travel blank, however it remained in the lab until analysis. Travel blank refers to water that was transported to the field.

**Table S11.** Individual and  $\Sigma$ PFAA concentrations (pg/L) for the 2009 *Endeavor* Cruise from Namibia to Rhode Island.

| Sample  | PFHxA | PFHpA | PFOA | PFNA | PFDA | PFUnDA | PFDoDA | PFTrDA | PFTeDA | PFBS | PFHxS | $\Sigma$ PFOS | FOSA | $\Sigma$ PFAAs |
|---------|-------|-------|------|------|------|--------|--------|--------|--------|------|-------|---------------|------|----------------|
| N. Bay. | 510   | 320   | 1200 | 754  | 319  | 150    | 23     | 15     | 4      | n.a. | 310   | 2200          | 46   | 5800           |
| 34      | 150   | 110   | 250  | 130  | 25   | 10     | n.d.   | n.d.   | n.d.   | n.a. | 51    | 190           | 7.9  | 920            |
| 33      | 63    | 53    | 80   | 63   | 8.6  | 6.3    | n.d.   | 0.9    | n.d.   | n.a. | 18    | 69            | 46   | 410            |
| 31      | 53    | 33    | 82   | 48   | 9.0  | 3.5    | 0.4    | 2.2    | 1.8    | n.a. | 13    | 46            | 5.3  | 300            |
| 32      | 110   | 82    | 120  | 98   | 14   | 7.7    | 0.2    | 1.3    | 1.6    | n.a. | 28    | 91            | 7.7  | 560            |
| 30      | 90    | 63    | 130  | 130  | 14   | 6.9    | n.d.   | n.d.   | n.d.   | n.a. | 26    | 93            | 9.2  | 560            |
| 29      | 32    | 21    | 30   | 16   | 5.7  | 1.6    | n.d.   | n.d.   | n.d.   | n.a. | 5.4   | 26            | 8.3  | 150            |
| 28      | 32    | 21    | 43   | 25   | 5.7  | 2.8    | n.d.   | n.d.   | n.d.   | n.a. | 5.8   | 25            | 3.1  | 160            |
| 27      | 31    | 18    | 42   | 27   | 4.8  | 1.9    | n.d.   | n.d.   | n.d.   | n.a. | 5.3   | 23            | 3.1  | 160            |
| 26      | 36    | 25    | 39   | 26   | 5.9  | 2.2    | 0.8    | n.d.   | n.d.   | n.a. | 7.3   | 27            | 2.4  | 170            |
| 25      | 31    | 21    | 49   | 26   | 5.5  | 1.0    | 0.3    | n.d.   | n.d.   | n.a. | 5.9   | 26            | 2.3  | 170            |
| 24      | 24    | 14    | 21   | 3.8  | 3.1  | 1.5    | n.d.   | n.d.   | n.d.   | n.a. | 1.6   | 13            | 1.1  | 83             |
| 23      | 28    | 19    | 34   | 19   | 4.1  | 2.3    | n.d.   | n.d.   | n.d.   | n.a. | 5.8   | 23            | 5.5  | 140            |
| 22      | 22    | 18    | 37   | 21   | 4.9  | 1.6    | 1.4    | n.d.   | n.d.   | n.a. | 7.1   | 28            | 3.4  | 140            |
| 20      | 25    | 21    | 44   | 20   | 4.2  | 1.6    | 0.9    | n.d.   | n.d.   | n.a. | 6.0   | 22            | 1.9  | 150            |
| 21      | 25    | 19    | 40   | 18   | 4.8  | 2.9    | n.d.   | n.d.   | n.d.   | n.a. | 5.4   | 21            | 1.7  | 140            |
| 19      | 42    | 30    | 45   | 25   | 5.3  | 0.0    | n.d.   | n.d.   | n.d.   | n.a. | 6.0   | 32            | 3.6  | 190            |
| 18      | 25    | 15    | 34   | 20   | 5.6  | 2.3    | n.d.   | n.d.   | n.d.   | n.a. | 4.5   | 27            | 3.7  | 140            |
| 17      | 32    | 20    | 31   | 20   | 4.7  | 2.3    | 0.7    | n.d.   | n.d.   | n.a. | 4.1   | 23            | 6.9  | 150            |
| 16      | 22    | 18    | 36   | 13   | 5.4  | 2.0    | 0.3    | n.d.   | n.d.   | n.a. | 4.0   | 21            | 4.3  | 130            |
| 15      | 24    | 12    | 24   | 16   | 5.2  | 1.2    | 0.2    | n.d.   | n.d.   | n.a. | 4.7   | 21            | 4.8  | 110            |
| 14      | 36    | 23    | 32   | 10   | 8.0  | 0.3    | n.d.   | n.d.   | n.d.   | n.a. | 3.1   | 24            | 3.0  | 140            |
| 13      | 14    | 7     | 18   | 5.5  | 4.0  | 0.4    | n.d.   | n.d.   | n.d.   | n.a. | 1.4   | 13            | 14   | 77             |
| 12      | 45    | 24    | 30   | 12   | 4.3  | 1.5    | n.d.   | n.d.   | n.d.   | n.a. | 4.9   | 32            | 11   | 170            |
| 11      | 51    | 31    | 26   | 11   | 5.8  | 0.0    | n.d.   | n.d.   | n.d.   | n.a. | 2.7   | 20            | 19   | 170            |
| 10      | 23    | 14    | 26   | 8.4  | 6.5  | 0.3    | n.d.   | n.d.   | n.d.   | n.a. | 2.8   | 17            | 7.0  | 110            |
| 9       | 28    | 14    | 24   | 7.0  | 9.3  | 0.0    | n.d.   | n.d.   | n.d.   | n.a. | 2.0   | 14            | 2.0  | 100            |
| 8       | 75    | 51    | 30   | 11   | 5.2  | 0.5    | n.d.   | n.d.   | n.d.   | n.a. | 3.0   | 29            | 2.3  | 210            |
| 7       | 43    | 24    | 24   | 9.0  | 6.7  | 0.3    | n.d.   | n.d.   | n.d.   | n.a. | 3.3   | 24            | 5.9  | 140            |
| 6       | 31    | 21    | 27   | 8.0  | 4.5  | 1.0    | n.d.   | n.d.   | n.d.   | n.a. | 4.2   | 26            | 5.1  | 130            |
| 5       | 29    | 17    | 17   | 6.2  | 5.2  | 0.3    | n.d.   | n.d.   | n.d.   | n.a. | 2.7   | 18            | 4.7  | 100            |
| 4       | 18    | 12    | 18   | 5.4  | 3.3  | 0.1    | n.d.   | n.d.   | n.d.   | n.a. | 2.8   | 23            | 3.2  | 90             |
| 3       | 25    | 21    | 25   | 19   | 4.3  | 2.4    | n.d.   | n.d.   | n.d.   | n.a. | 4.5   | 20            | 11   | 130            |
| 2       | 43    | 29    | 24   | 8.0  | 4.1  | 0.1    | n.d.   | n.d.   | n.d.   | n.a. | 2.5   | 18            | 3.3  | 130            |
| 1       | 40    | 23    | 27   | 11   | 4.6  | 0.5    | n.d.   | n.d.   | n.d.   | n.a. | 2.5   | 30            | 5.3  | 140            |

n.a.-not included in analysis.

n.d.-not detected

**Table S12.** Individual and  $\Sigma$ PFAA concentrations (pg/L) for the 2007 *Oden* Cruise from the Bay of Biscay to Argentina. Values shown represent the average of n=2 samples/location.

| Sample | PFHxA | PFHpA | PFOA | PFNA | PFDA | PFUnDA | PFDODA | PFTrDA | PFTeDA | PFBS | PFHxS | $\Sigma$ PFOS | FOSA | $\Sigma$ PFAAs |
|--------|-------|-------|------|------|------|--------|--------|--------|--------|------|-------|---------------|------|----------------|
| 1      | 110   | 78    | 260  | 46   | 24   | 12     | 39     | n.d.   | n.d.   | 180  | 33    | 180           | n.d. | 960            |
| 2      | 96    | 54    | 180  | 50   | 24   | 16     | 36     | 17     | n.d.   | 160  | 30    | 150           | n.d. | 800            |
| 3      | 47    | n.d.  | 96   | 26   | 7.7  | 7.6    | 7.3    | 2.0    | 5.9    | 7.0  | 11    | 61            | 0.5  | 280            |
| 4      | 96    | 54    | 200  | 62   | 16   | 24     | 94     | n.d.   | n.d.   | 130  | 31    | 120           | n.d. | 830            |
| 5      | 95    | 58    | 180  | 70   | 19   | 19     | 20     | 17     | n.d.   | 190  | 26    | 160           | n.d. | 860            |
| 6      | 110   | 73    | 210  | 54   | 19   | 23     | 51     | n.d.   | n.d.   | 220  | 36    | 190           | n.d. | 980            |
| 7      | 17    | 20    | 35   | 15   | 17   | 3.7    | 6.0    | n.d.   | n.d.   | n.d. | 9.0   | 43            | 1.8  | 170            |
| 8      | 51    | 18    | 89   | 22   | 14   | 11     | 25     | n.d.   | n.d.   | 88   | 17    | 78            | n.d. | 410            |
| 10     | 41    | 18    | 41   | 9.1  | 9.2  | 4.3    | 2.8    | 6.0    | 7.8    | n.d. | 5.2   | 52            | 1.0  | 200            |
| 11     | 12    | n.d.  | 23   | 3.1  | 3.4  | 2.9    | 1.8    | 1.4    | 4.4    | 1.7  | 1.4   | 30            | n.d. | 85             |
| 14     | n.d.  | 10    | 32   | 5.8  | 7.9  | 1.9    | 5.3    | 10     | 13     | n.d. | 4.8   | 38            | 1.3  | 130            |
| 16     | 17    | 5.4   | 22   | 3.1  | 30   | 5.4    | 5.7    | 5.0    | 3.3    | n.d. | 5.0   | 18            | n.d. | 120            |
| 17     | 10    | 5.4   | 26   | 3.7  | 9.1  | 14     | 55     | 24     | n.d.   | 50   | 8.0   | 41            | n.d. | 250            |
| 18     | 2.8   | 5.5   | 10   | 13   | 2.9  | 3.5    | 3.2    | n.d.   | 4.1    | n.d. | 2.2   | 18            | n.d. | 66             |
| 19     | 5.7   | 8.3   | 12   | 2.4  | 7.1  | 5.4    | 15     | 8.7    | n.d.   | n.d. | n.d.  | 33            | 1.9  | 99             |
| 20     | 5.9   | 5.6   | 13   | 2.5  | 7.0  | 3.7    | 6.6    | 9.9    | n.d.   | n.d. | n.d.  | 23            | 2.7  | 79             |
| 21     | 3.9   | 3.9   | 5.2  | 9.2  | 7.0  | 4.7    | 1.6    | n.d.   | 6.2    | n.d. | 1.9   | 32            | n.d. | 80             |
| 22     | 4.3   | 4.4   | 7.0  | 10   | 5.8  | 3.3    | 1.3    | n.d.   | 7.5    | n.d. | 2.3   | 38            | n.d. | 84             |
| 23     | 7.6   | 6.4   | 14   | 6.8  | 6.1  | 4.7    | 4.1    | n.d.   | n.d.   | n.d. | n.d.  | 24            | n.d. | 74             |
| 24     | 11    | 5.5   | 13   | 15   | 4.0  | 2.3    | 2.1    | n.d.   | 7.6    | n.d. | 4.3   | 44            | n.d. | 110            |
| 25     | 36    | n.d.  | 100  | 8.3  | 24   | 92     | 46     | 0.2    | 17     | 28   | 16    | 170           | n.d. | 540            |
| 26     | 37    | n.d.  | 110  | 9.0  | 7.5  | 4.2    | n.d.   | 2.2    | 4.6    | 20   | 16    | 140           | 2.8  | 350            |
| 27     | 3.9   | 3.0   | 3.0  | 7.2  | 7.9  | 7.2    | 6.3    | n.d.   | 5.5    | n.d. | 3.7   | 37            | n.d. | 85             |
| 28     | 9.7   | 7.1   | 6.9  | 4.1  | 5.8  | 2.3    | 5.8    | n.d.   | n.d.   | n.d. | n.d.  | 45            | n.d. | 87             |
| 29     | 7.8   | 1.7   | 7.6  | 2.8  | 4.1  | 6.7    | 5.0    | 1.8    | n.d.   | n.d. | n.d.  | 22            | n.d. | 60             |
| 30     | 8.0   | 1.5   | 4.5  | 3.7  | 3.6  | 2.2    | 3.8    | n.d.   | 4.6    | n.d. | 1.7   | 19            | n.d. | 52             |

n.d.-not detected

**Table S13.** Individual and  $\Sigma$ PFAA concentrations (pg/L) for all Arctic sampling locations

| Sample | PFHxA | PFHpA | PFOA | PFNA | PFDA | PFUnDA | PFDoDA | PFTrDA | PFTeDA | PFBS | PFHxS | $\Sigma$ PFOS | FOSA | $\Sigma$ PFAA |
|--------|-------|-------|------|------|------|--------|--------|--------|--------|------|-------|---------------|------|---------------|
| 30     | 45    | 64    | 32   | 6.0  | 8.4  | 4.3    | n.d.   | n.d.   | n.d.   | n.a. | 15    | 27            | 3.5  | 210           |
| 28     | 11    | 56    | 37   | 5.5  | n.d. | 0.9    | n.d.   | n.d.   | n.d.   | n.a. | 4.5   | 14            | n.d. | 130           |
| 27     | 22    | 37    | 39   | 6.2  | 12   | 4.1    | 1.9    | 2.5    | 3.3    | n.a. | 2.6   | 15            | n.d. | 150           |
| 26     | 24    | 24    | 26   | 13   | n.d. | 3.2    | n.d.   | 2.5    | 2.5    | n.a. | 3.6   | 11            | n.d. | 110           |
| 25     | 21    | 12    | 33   | 13   | n.d. | 3.2    | 1.2    | 2.7    | 1.4    | n.a. | n.d.  | 9.5           | n.d. | 97            |
| 24     | 5.2   | 11    | 23   | 2.0  | n.d. | 5.3    | n.d.   | n.d.   | n.d.   | n.a. | 12    | 27            | 11   | 97            |
| 23     | 17    | 18    | 25   | 7.7  | 8.4  | 3.1    | 2.1    | 1.7    | 1.3    | n.a. | 19    | 29            | 6.3  | 140           |
| 22     | 18    | 41    | 29   | 11   | n.d. | 1.0    | n.d.   | n.d.   | n.d.   | n.a. | 5.1   | 9.1           | n.d. | 114           |
| 21     | 4.6   | 20    | 22   | 10   | n.d. | n.d.   | n.d.   | n.d.   | n.d.   | n.a. | n.d.  | 9.5           | 1.4  | 68            |
| 19     | 6.1   | 12    | 6.5  | 1.9  | n.d. | 13     | n.d.   | n.d.   | n.d.   | n.a. | n.d.  | n.d.          | n.d. | 40            |
| 17     | 18    | 18    | 33   | 6.0  | 33   | 9.7    | 4.2    | n.d.   | 3.1    | n.a. | 3.3   | 20            | 2.6  | 150           |
| 15     | 48    | 53    | 35   | 15   | 9.7  | 4.0    | 7.2    | 11     | 14     | n.a. | 0.7   | 28            | 2.3  | 230           |
| R08    | 3.0   | 84    | 47   | 47   | 7.5  | 12     | 6.5    | n.d.   | n.d.   | n.a. | 3.0   | 29            | n.d. | 240           |
| 14     | 23    | 17    | 28   | 8.4  | 16   | 5.9    | 3.2    | 6.4    | 4.0    | n.a. | 1.2   | 16            | n.d. | 130           |
| 13     | 14    | 41    | 15   | 7.4  | 11   | 79     | 32     | n.d.   | n.d.   | n.a. | n.d.  | n.d.          | 44   | 240           |
| 303    | 65    | 37    | 54   | 15   | 16   | 8.4    | 6.6    | 3.9    | 3.3    | n.a. | 2.8   | 32            | 3.1  | 250           |
| 12     | 14    | 23    | 20   | 4.8  | 21   | 4.6    | 2.0    | 6.1    | 1.5    | n.a. | 1.0   | 8.8           | n.d. | 110           |
| 137    | 20    | 19    | 27   | 7.9  | 2.3  | 7.2    | n.d.   | 3.2    | 0.9    | n.a. | 6.2   | 15            | 2.6  | 110           |
| 8      | 23    | 20    | 26   | 3.7  | n.d. | 3.6    | 2.2    | 3.1    | 4.3    | n.a. | 0.7   | 14            | n.d. | 100           |
| 205    | 22    | 18    | 28   | 6.6  | n.d. | n.d.   | 2.3    | n.d.   | 3.3    | n.a. | 8.1   | 14            | n.d. | 100           |
| 126    | 24    | 31    | 41   | 13   | 12   | 13     | 10     | 21     | 3.1    | n.a. | 8.0   | 28            | 2.2  | 210           |
| 7      | n.d.  | 29    | 23   | 7.8  | n.d. | 2.8    | 18     | n.d.   | n.d.   | n.a. | 1.0   | 9.4           | 2.7  | 94            |
| 6      | 4.7   | 13    | 24   | 4.3  | n.d. | 20     | n.d.   | n.d.   | n.d.   | n.a. | 15    | n.d.          | n.d. | 81            |
| 5      | 7.9   | 17    | 21   | n.d. | n.d. | 33     | 20     | n.d.   | n.d.   | n.a. | 13    | 39            | 13   | 160           |
| 4      | 23    | 19    | 32   | 9.5  | 24   | 17     | 6.8    | 8.3    | 9.1    | n.a. | 3.8   | 18            | 1.3  | 170           |
| 3      | 26    | 21    | 29   | 3.0  | 9.5  | 1.5    | n.d.   | 1.6    | 0.8    | n.a. | n.d.  | 10            | n.d. | 100           |
| 2      | 9.5   | 49    | 35   | 9.1  | n.d. | 1.8    | n.d.   | n.d.   | n.d.   | n.a. | 5.6   | 20            | 7.5  | 140           |
| 1      | 2.9   | 28    | 23   | 3.1  | n.d. | 1.2    | n.d.   | n.d.   | n.d.   | n.a. | 1.6   | 11            | 2.4  | 73            |

n.a.-not included in analysis.

n.d.-not detected

## REFERENCES

1. Scott, B. F.; Spencer, C.; Lopez, E.; Muir, D. C. G. Perfluoroalkyl acid concentrations in Canadian rivers and creeks. *Water Qual. Res. J. Can.* **2009**, *44*, 263-277.
2. Yamashita, N.; Kannan, K.; Taniyasu, S.; Horii, Y.; Petrick, G.; Gamo, T. A global survey of perfluorinated acids in oceans. *Mar. Pollut. Bull.* **2005**, *51*, 658-668.
3. Ahrens, L.; Barber, J. L.; Xie, Z.; Ebinghaus, R. Longitudinal and latitudinal distribution of perfluoroalkyl compounds in the surface water of the Atlantic Ocean. *Environ. Sci. Technol.* **2009**, *43*, 3122-3127.
4. Ahrens, L.; Xie, Z.; Ebinghaus, R. Distribution of perfluoroalkyl compounds in seawater from Northern Europe, Atlantic Ocean, and Southern Ocean. *Chemosphere* **2010**, *78*, 1011-1016.
5. Theobald, N.; Gerwinski, W.; Caliebe, C.; Haarich, M. *Development and validation of a method for the determination of polyfluorinated organic substances in sea water, sediments and biota. Occurrence of these compounds in the North and Baltic Seas. Report No. UBA-FB: 001049 (in German).* 2007.
6. Theobald, N.; Caliebe, C.; Gerwinski, W.; Hühnerfuss, H.; Lepom, P., Occurrence of perfluorinated organic acids in the North and Baltic seas. Part 1: distribution in sea water. *Environ. Sci. Pollut. Res. Int.* **2011**, *18*, 1057-1069.
7. Caliebe, C.; Gerwinski, W.; Hühnerfuss, H.; Theobald, N. Occurrence of perfluorinated organic acids in the water of the North Sea. *Organohalogen Cps.* **2004**, *66*, 4074-4078.
8. Rosenberg, B.; DeLaronde, J.; MacHutchon, A.; Stern, G.; Spencer, C.; Scott, B.; Lopez, E.; Muir, D.; Tomy, G. Spatial and vertical distribution of perfluorinated compounds in Canadian Arctic and sub-arctic ocean water. *Organohalogen Cps.* **2008**, *70*, 386-389.
9. Cai, M.; Zhao, Z.; Yin, Z.; Ahrens, L.; Huang, P.; Cai, M.; Yang, H.; He, J.; Sturm, R.; Ebinghaus, R.; Xie, Z. Occurrence of perfluoroalkyl compounds in surface waters from the North Pacific to the Arctic Ocean. *Environ. Sci. Technol.* **2012**, *46*, 661-668.
10. Wei, S.; Chen, L. Q.; Taniyasu, S.; So, M. K.; Murphy, M. B.; Yamashita, N.; Yeung, L. W.; Lam, P. K., Distribution of perfluorinated compounds in surface seawaters between Asia and Antarctica. *Mar. Pollut. Bull.* **2007**, *54*, 1813-1818.
